# Supplementary material for: Ultrafast diffusion-controlled thiol–ene based crosslinking of silicone elastomers with tailored mechanical properties for biomedical applications
Source: Royal Society of Chemistry journal article supplement (doi:10.1039/c6py01134a), 2016-01-01
Supplement: c6py01134a2.pdf [file c6py01134a2.pdf]

# Ultrafast Diffusion-Controlled Thiol-Ene Based Crosslinking of Silicone Elastomers with Tailored Mechanical Properties for Biomedical Applications

Electronic Supplementary Information

**Khai D. Q. Nguyen<sup>1,2</sup>, William V. Megone<sup>1,2</sup>, Dexu Kong<sup>1,2</sup>, and Julien E. Gautrot<sup>1,2\*</sup>**

*\*Corresponding author. [j.gautrot@qmul.ac.uk](mailto:j.gautrot@qmul.ac.uk)*

*<sup>1</sup>Institute of Bioengineering and <sup>2</sup>School of Engineering and Materials Science, Queen Mary, University of London, Mile End Road, London, E1 4NS, UK.*

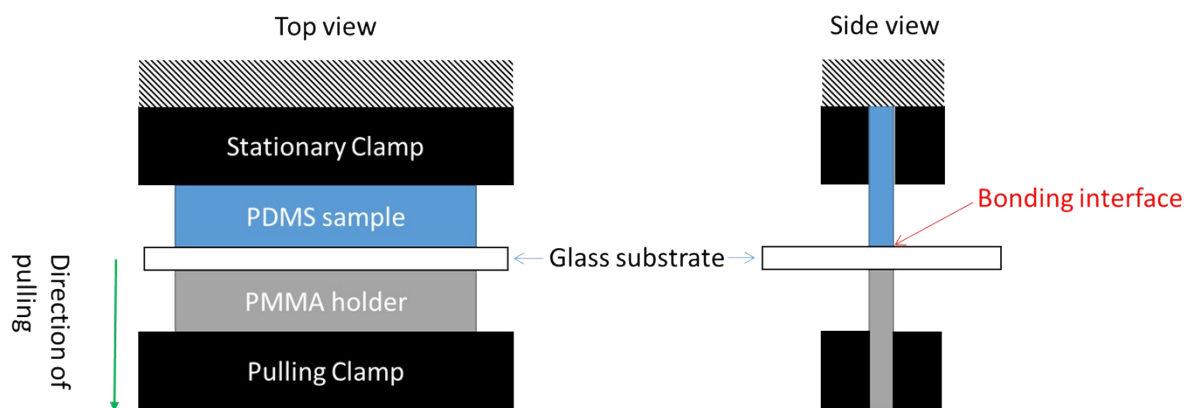

**Supplementary Figure S1.** The schematic presentation of the clamping of PDMS-Glass bonding structure on the Deben Microtester 200N tensile rig in SEM chamber. A small piece of PMMA was glued to one side of glass slide to allow the setup to be clamped in the rig.

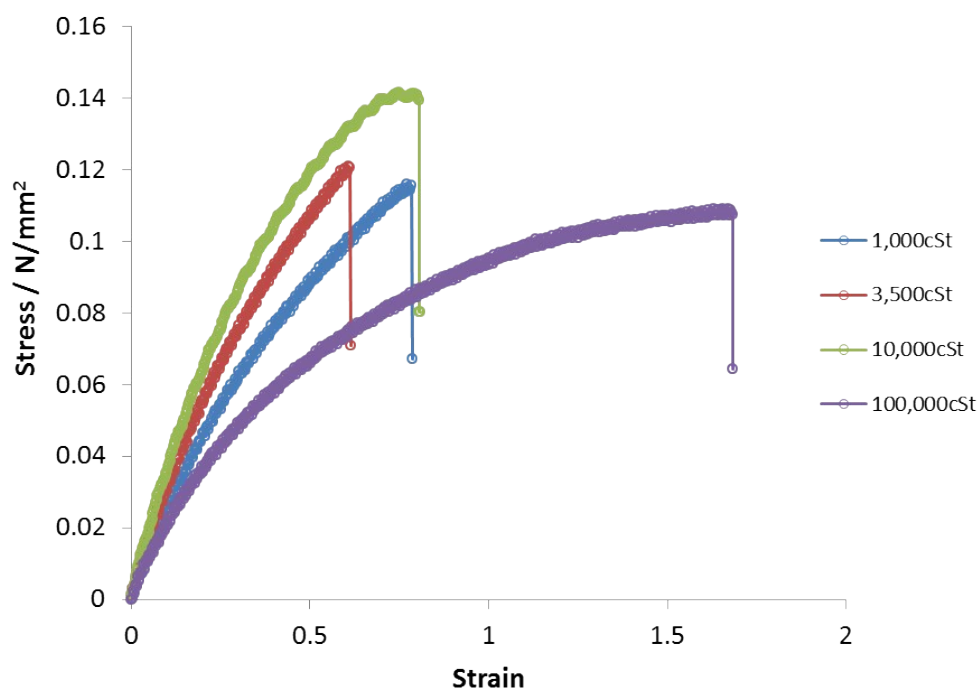

**Supplementary Figure S2.** Stress–strain curves obtained from the tensile mechanical measurement using an Instron frame equipped with a 5 N load cell. The measurement was conducted at room temperature at a constant strain rate of 1 mm/mm/minute. The UV curable resins were formulated from different viscosities of cross-linker (see legends), with alkene:thiol ratio of 1:2, and DMPA as photoinitiator (thiol:photoinitiator molar ratio of 1:0.1)

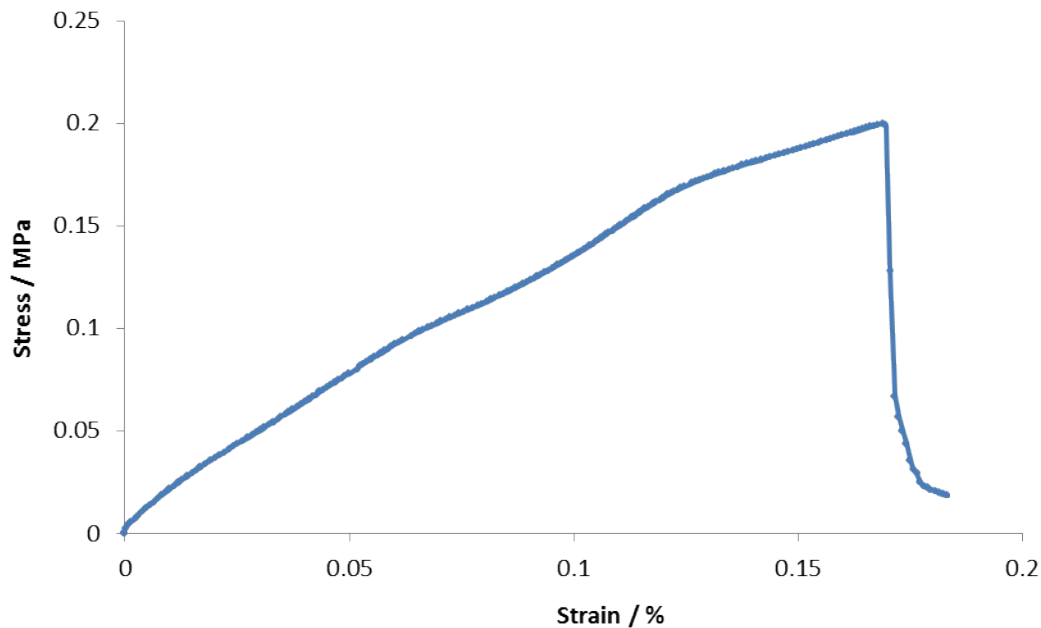

**Supplementary Figure S3.** Stress –strain curve obtained from the Deben Microtester during the tensile test. The cross-linked PDMS substrate was cured at  $94\text{mW}/\text{cm}^2$  from the resin formulated from alkene:thiol ratio of 1:2 and vinyl-PDMS of 10,000cSt. Tensile tests were performed at a rate of 1 mm/min *in situ* with SEM microscopy.

See file: *SupplementaryVideo1.mp4*

**Supplementary Video 1. SEM imaging of the cohesive failure of a glass/thiol-ene PDMS interface.**

A micro-patterned PDMS sample was bonded to an acrylate-functionalised glass slide and mounted in a tensile-testing set up. SEM imaging was carried out whilst applying a stretching rate of 1 mm/min. The speed of the video has been increased 8 times compared to the real stretching rate.
